# Supplementary material
Source: Springer Nature journal article supplement (https://www.springermedizin.de/resource/supplementary/13018_2007_54_MOESM2_ESM.pdf/9636322)

**Patients**

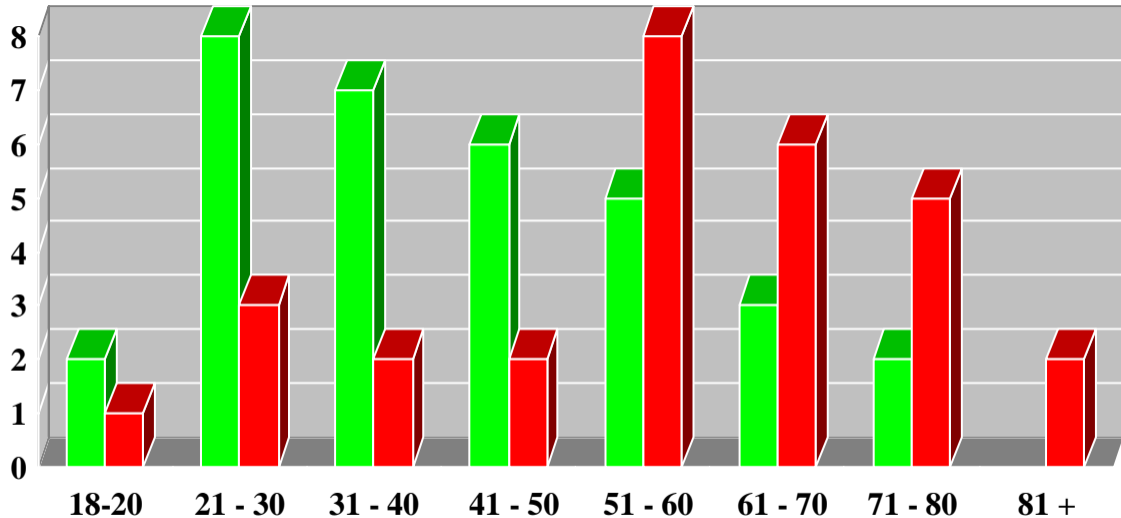

**Men**

**Women**

**Age**

Supplement: MOESM2 [file 9636322]
